# Supplementary material for: In silico analysis of maize HDACs with an emphasis on their response to biotic and abiotic stresses
Source: PeerJ. 2020 Feb 12;8:e8539. doi: 10.7717/peerj.8539 (PMC7023831; doi:10.7717/peerj.8539)
Supplement: Table S2 [file peerj-08-8539-s002.xlsx]

## Sheet: Sheet1
SRA ID	Sample
SRX118463	24H_Germinating Seed_R1
SRX118464	24H_Germinating Seed_R2
SRX118465	24H_Germinating Seed_R3
SRX118467	GH_Primary_Root_1
SRX118468	GH_Primary_Root_2
SRX118469	GH_Primary_Root_3
SRX118470	GH_Primary_Root_4
SRX118471	Stem_SAM_V3_1
SRX118472	Stem_SAM_V3_2
SRX118473	Stem_SAM_V3_3
SRX118474	Stem_SAM_V3_4
SRX118485	Eighth_Leaf_V9_1
SRX118486	Eighth_Leaf_V9_2
SRX118487	Eighth_Leaf_V9_3
SRX118488	Eleventh_Leaf_V9_1
SRX118489	Eleventh_Leaf_V9_2
SRX118490	Eleventh_Leaf_V9_3
SRX118491	Thirteenth_Leaf_V9_1
SRX118492	Thirteenth_Leaf_V9_2
SRX118493	Thirteenth_Leaf_V9_3
SRX118505	Thirteenth _Leaf_VT_1
SRX118506	Thirteenth _Leaf_VT_2
SRX118507	Thirteenth _Leaf_VT_3
SRX118508	Thirteenth _Leaf_R2_1
SRX118509	Thirteenth _Leaf_R2_2
SRX118510	Thirteenth _Leaf_R2_3
SRX118511	Whole_seed_10DAP_1
SRX118512	Whole_seed_10DAP_2
SRX118513	Whole_seed_10DAP_3
SRX118514	Whole_seed_12DAP_1
SRX118515	Whole_seed_12DAP_2
SRX118516	Whole_seed_12DAP_3
SRX118520	Whole_seed_14DAP_1
SRX118521	Whole_seed_14DAP_2
SRX118522	Whole_seed_14DAP_3
SRX118526	Whole_seed_16DAP_1
SRX118527	Whole_seed_16DAP_2
SRX118528	Whole_seed_16DAP_3
SRX118517	Endosperm_12DAP_1
SRX118518	Endosperm_12DAP_2
SRX118519	Endosperm_12DAP_3
SRX118523	Endosperm_14DAP_1
SRX118524	Endosperm_14DAP_2
SRX118525	Endosperm_14DAP_3
SRX118529	Endosperm_16DAP_1
SRX118530	Endosperm_16DAP_2
SRX118531	Endosperm_16DAP_3
SRX058597	Pre_emergence_cob
SRX058598	Preemergence_tassel
SRX058599	Post_emergence_cob
SRX058600	Postemergence_tassel
SRX058604	Anthers
SRX058605	Ovule
SRX058606	Pollen
